# Supplementary material for: Scalable and facile synthesis of stretchable thermoelectric fabric for wearable self-powered temperature sensors
Source: Royal Society of Chemistry journal article supplement (doi:10.1039/c8ra06664g), 2018-01-01
Supplement: c8ra06664g1.pdf [file c8ra06664g1.pdf]

## Supporting Information

### **Scalable and facile process of stretchable thermoelectric fabric for wearable self-powered temperature sensors**

Minhyun Jung<sup>1</sup>, Sanghun Jeon<sup>2\*</sup>, Jihyun Bae<sup>3\*</sup>

\*Corresponding authors: Email: E-mail: [jbae2@hanyang.ac.kr](mailto:jbae2@hanyang.ac.kr), [jeonsh@kaist.ac.kr](mailto:jeonsh@kaist.ac.kr)

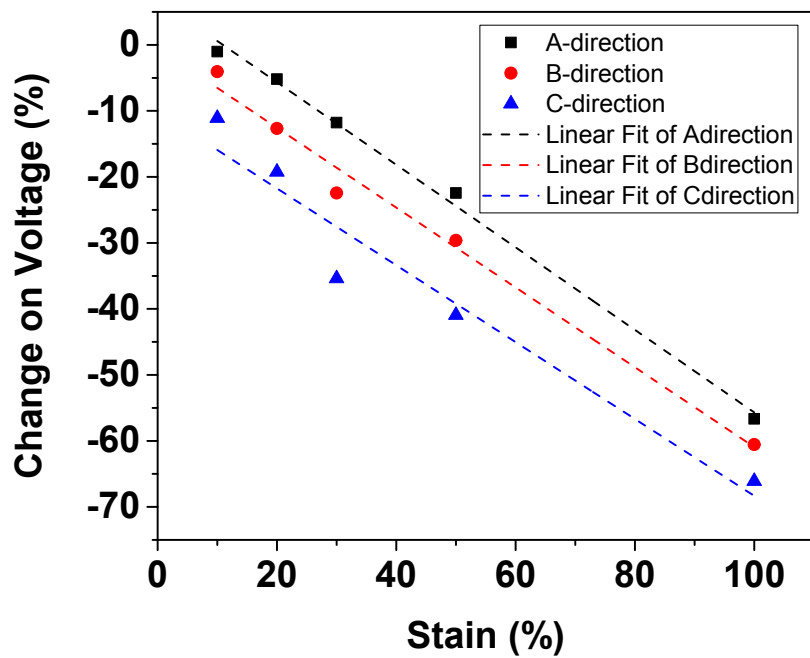

**Figure S1.** A graph presenting the change on the voltage by increasing stretching rate A-, B-, and C-directions, respectively.

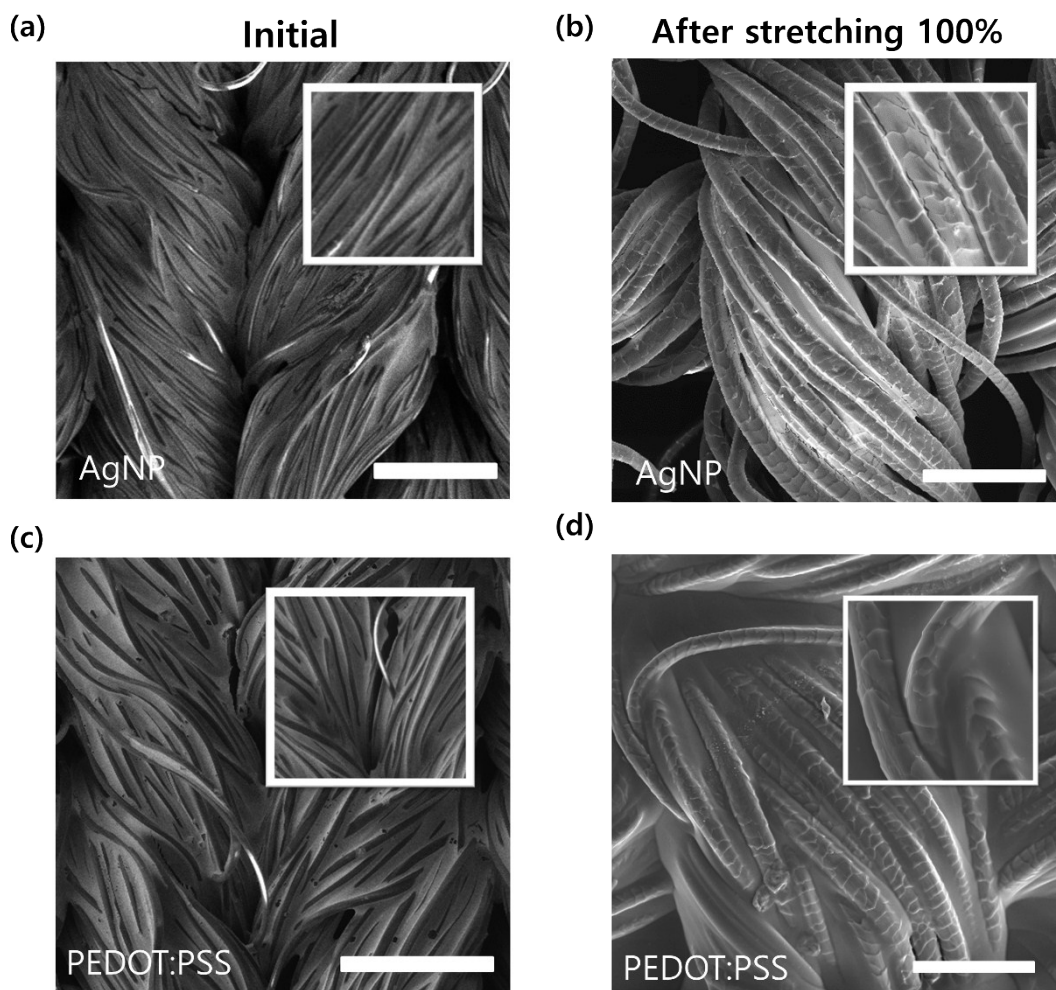

**Figure S2.** SEM images of the knitted fabric substrate printed with AgNPs before (a) and after stretching 100% (c) and PEDOT:PSS before (b) and after stretching 100% (d).
